# Supplementary material
Source: MDPI journal article supplement (https://www.mdpi.com/2071-1050/10/11/4044)
Supplement: s1 [file s1]

Archive with 5 entries (5 files):
- Footprint.pdf
- HOPE_questionnaire.pdf
- S2.xlsx
- Sector_spec.pdf
- Tables.xlsx
