# Supplementary material
Source: MDPI journal article supplement (https://www.mdpi.com/2071-1050/10/11/4044)
Supplement: s1 [file s1 › Footprint.pdf]

**Baseline  
carbon footprint**

**Household consumption sector**

**Mobility**

**Food**

**Housing**

**Other**

**Commodities**

- Car, MC, and other motorized vehicles
- Train
- Bus
- Plane

- Red meat
- Other meat
- Fish
- Dairy
- Fruit/vegetables
- Drinks (canned/bottled)
- Ready made meals
- Restaurant- and school meals
- Other food

- Heating
- Hot water
- Cooking
- Lights etc.
- Furniture/renovation
- Appliances
- House construction

- Clothes/ shoes
- Cosmetics/ hygiene
- Digital devices
- Holiday- and leisure activities
- Newspapers, magazines, books
- Insurance (administration etc.)
- Phone/ internet
