# Supplementary material
Source: MDPI journal article supplement (https://www.mdpi.com/2071-1050/10/11/4044)
Supplement: s1 [file s1 › S2.xlsx]

## Sheet: Actions
			Number of households in each segment of the Climate game							Percent of households that could choose actions					Percent of households that could not choose actions			Observed reduction (kg Co2e per year)
Sector	Action card	Reduction kg CO2e per year	Voluntary scenario (n)	Voluntary scenario (n)	Already done (n)	Not possible (n)	Not chosen (n)	Total (N)		Voluntary scenario (%)	Voluntary scenario (%)	Not chosen (%)	Total (%)		Already done (%)	Not possible (%)
Housing	H1.1 Insulate your roof / attic	202.4	31	22	49	157	49	308		0.303922	0.215686	0.480392	1		0.159091	0.50974		120.507
	H1.2 Insulate your walls	171.717	31	23	45	130	79	308		0.233083	0.172932	0.593985	1		0.146104	0.422078		95.6919
	H1.3 Improve your windows	141.735	38	29	66	116	59	308		0.301587	0.230159	0.468254	1		0.214286	0.376623		79.5186
	H2.1 Install an hourly thermostats	44.2122	70	25	92	24	97	308		0.364583	0.130208	0.505208	1		0.298701	0.0779221		28.6192
	H2.2 Lower inhouse temperature by 1°C	52.5114	124	50	0	10	124	308		0.416107	0.167785	0.416107	1		0	0.0324675		31.1971
	H2.3 Lower indoor temperature by 3°C	156.334	27	45	1	18	217	308		0.0934256	0.155709	0.750865	1		0.00324675	0.0584416		91.4337
	H3.1 Shift to energy efficient heat pump	685.621	16	8	15	179	90	308		0.140351	0.0701754	0.789474	1		0.0487013	0.581169		430.81
	H3.3 Shift to thermal solar collector for hot water	72.5072	17	9	13	168	101	308		0.133858	0.0708661	0.795276	1		0.0422078	0.545455		38.7036
	H3.4 Shift to thermal solar collector for heating and hot water	466.457	11	19	6	165	107	308		0.080292	0.138686	0.781022	1		0.0194805	0.535714		262.97
	H3.5 Shift to wood/ pellet boiler as main heating source	832.974	11	17	13	164	103	308		0.0839695	0.129771	0.78626	1		0.0422078	0.532468		539.169
	H3.7 Improve the energy efficiency of your heating systems	192.354	56	25	16	58	153	308		0.239316	0.106838	0.653846	1		0.0519481	0.188312		110.877
	H4.1 Produce your own electricity (photovoltaic or wind mill system)	749.952	42	46	15	147	58	308		0.287671	0.315068	0.39726	1		0.0487013	0.477273		383.054
	H4.2 Shift to a green electricity provider	341.069	88	52	128	3	37	308		0.497175	0.293785	0.20904	1		0.415584	0.00974026		219.667
	H5.1 Use fewer devices and maintain them better	36.3	132	73	12	2	89	308		0.44898	0.248299	0.302721	1		0.038961	0.00649351		23.8333
	H5.2 Upgrade all of your home appliances to A +++	53.76	127	34	94	2	51	308		0.599057	0.160377	0.240566	1		0.305195	0.00649351		32.768
	H5.3 Give up some of your appliances or share them with others	31.8386	42	66	10	2	188	308		0.141892	0.222973	0.635135	1		0.0324675	0.00649351		19.0667
	H6.1 Collective living: share your house with others	359.427	19	43	79	10	157	308		0.086758	0.196347	0.716895	1		0.256494	0.0324675		205.52
	H6.2 Use more public transportation as a result of moving to the city center	1190.93	20	28	128	14	118	308		0.120482	0.168675	0.710843	1		0.415584	0.0454545		663.358
	H6.3 Buy and move to a low energy house (e.g. passive house)	902.743	47	58	7	3	193	308		0.157718	0.194631	0.647651	1		0.0227273	0.00974026		556.475
	H6.4 Buy and move to a smaller house/apartment	194.864	45	50	3	2	208	308		0.148515	0.165017	0.686469	1		0.00974026	0.00649351		118.42
Food	F1.1 Buy mainly fresh products, and give up deep frozen and canned produce	404.283	178	77	3	0	50	308		0.583607	0.252459	0.163934	1		0.00974026	0		256.963
	F1.2 Buy at least 30% more locally produced food	403.502	137	21	4	0	146	308		0.450658	0.0690789	0.480263	1		0.012987	0		256.418
	F1.3 Buy at least 60% more locally produced food	804.053	63	159	2	1	83	308		0.206557	0.521311	0.272131	1		0.00649351	0.00324675		512.713
	F1.4 Buy at least 30% more organic food products	402.027	123	19	2	0	164	308		0.401961	0.0620915	0.535948	1		0.00649351	0		256.356
	F1.5 Buy at least 60% more organic food products	804.053	49	162	2	1	94	308		0.160656	0.531148	0.308197	1		0.00649351	0.00324675		512.713
	F2.1 Eat 30% more vegetarian food (eat less meat and fish)	258.845	107	34	24	0	143	308		0.376761	0.119718	0.503521	1		0.0779221	0		166.97
	F2.2 Eat 60% more vegetarian food (eat less meat and fish)	519.068	35	96	23	1	153	308		0.123239	0.338028	0.538732	1		0.0746753	0.00324675		343.174
	F2.3 Become a vegetarian (stop eating meat and fish)	835.323	10	37	24	1	236	308		0.0353357	0.130742	0.833922	1		0.0779221	0.00324675		547.25
	F3.1 Gradually give up ready-made meals	89.8092	83	43	151	1	30	308		0.532051	0.275641	0.192308	1		0.49026	0.00324675		52.52
	F3.2 Eat more eco-friendly food in restaurants and canteens	311.22	96	73	4	54	81	308		0.384	0.292	0.324	1		0.012987	0.175325		208.192
	F3.3 Produce your own food	364.356	96	66	87	1	58	308		0.436364	0.3	0.263636	1		0.282468	0.00324675		223.242
	F4.1 Recycle 30% more of your waste	263.253	73	31	191	1	12	308		0.62931	0.267241	0.103448	1		0.62013	0.00324675		169.898
	F4.2 Buy products with less or greener packaging	55.115	201	50	0	0	57	308		0.652597	0.162338	0.185065	1		0	0		36.7433
	F4.3 Stop buying plastic and canned beverages	158.496	99	89	57	0	63	308		0.394422	0.354582	0.250996	1		0.185065	0		82.4639
	F4.4 Compost or recycle organic waste	3.75804	86	23	104	16	79	308		0.457447	0.12234	0.420213	1		0.337662	0.0519481		2.50536
Mobility	M1.1 Shift significantly (more than 30%) from car to public transport	834.721	65	69	49	5	120	308		0.255906	0.271654	0.472441	1		0.159091	0.0162338		464.205
	M1.2 Shift to non motorized modes of transport (walk, bike…) instead of public transport	85.38	96	27	130	3	52	308		0.548571	0.154286	0.297143	1		0.422078	0.00974026		46.558
	M1.3 Use carpooling /car sharing for at least 30% of your current car mobility	402.724	47	59	2	54	146	308		0.186508	0.234127	0.579365	1		0.00649351	0.175325		243.239
	M2.1 Eco-driving	211.88	67	24	173	21	23	308		0.587719	0.210526	0.201754	1		0.561688	0.0681818		129.322
	M2.2 Decrease your travels with cars, public transports and other motorized vehicles by 30%	767.176	68	114	25	2	99	308		0.241993	0.405694	0.352313	1		0.0811688	0.00649351		473.125
	M2.3 Give up your car(s) and other motorized vehicle(s)	1972.81	10	46	47	3	202	308		0.0387597	0.178295	0.782946	1		0.152597	0.00974026		1177.63
	M3.1 Change to a smaller car (new or second hand)	469.542	18	9	38	49	194	308		0.081448	0.040724	0.877828	1		0.123377	0.159091		273.919
	M3.2 Change to a more eco-friendly car (hybrid, biogas, bioethanol, or electric)	531.344	84	18	12	47	147	308		0.337349	0.0722892	0.590361	1		0.038961	0.152597		321.39
	M3.3 Change to a smaller AND more eco-friendly car	1046.13	62	70	45	48	83	308		0.288372	0.325581	0.386047	1		0.146104	0.155844		603.434
	M4.1 Reduce your domestic and intereuropean flights by 50% (substitute with train, boat, or car)	504.878	41	53	108	0	106	308		0.205	0.265	0.53	1		0.350649	0		317.909
	M4.2 Reduce your domestic and intereuropean flights by 90%	903.466	17	81	114	0	96	308		0.0876289	0.417526	0.494845	1		0.37013	0		568.89
	M4.3 Reduce your intercontinental flights by 50%	1615.75	17	37	204	0	50	308		0.163462	0.355769	0.480769	1		0.662338	0		1077.17
	M4.4 Reduce your intercontinental flights by 90%	3529.15	9	43	204	0	52	308		0.0865385	0.413462	0.5	1		0.662338	0		2352.77
Other	C1.1 Buy 30% fewer clothes (repair, wait until damaged before changing)	61.95	114	74	5	1	114	308		0.377483	0.245033	0.377483	1		0.0162338	0.00324675		38.0217
	C1.2 Buy 30% of your clothes second hand	53.9375	57	43	21	0	187	308		0.198606	0.149826	0.651568	1		0.0681818	0		32.5248
	C1.3 Buy 30% more ecological clothing (eco- and organic labelled)	30.8625	76	66	1	0	165	308		0.247557	0.214984	0.537459	1		0.00324675	0		18.9804
	C2.1 Buy 30% less cosmetic products (or create them yourself)	70.1978	42	46	4	3	213	308		0.139535	0.152824	0.707641	1		0.012987	0.00974026		44.2219
	C2.2 Buy 30% more ecological cosmetics (eco- and organic labeled)	36.8388	69	30	78	0	131	308		0.3	0.130435	0.569565	1		0.253247	0		23.3993
	C2.3 Reduce your cosmetic and hygiene product consumption to the maximum	140.396	43	58	14	1	192	308		0.146758	0.197952	0.65529	1		0.0454545	0.00324675		86.4
	C3.1 Limit your use of internet (energy of servers, datacenters)	100	42	81	5	3	177	308		0.14	0.27	0.59	1		0.0162338	0.00974026		66.6667
	C3.2 Buy 30% fewer digital devices (give up or buy less)	162.72	50	81	70	1	106	308		0.21097	0.341772	0.447257	1		0.227273	0.00324675		96.88
	C3.3 Buy more energy efficient devices	151.572	156	67	0	1	84	308		0.508143	0.218241	0.273616	1		0	0.00324675		97.7485
	C4.1 Buy 30% less furniture and reduce your renovations by 50%	65.425	53	75	45	4	131	308		0.204633	0.289575	0.505792	1		0.146104	0.012987		35.4667
	C4.2 Buy 30% more second hand furniture or build30% of furniture yourself	22	53	46	53	19	137	308		0.224576	0.194915	0.580508	1		0.172078	0.0616883		13.0952
	C4.3 Buy 30% more eco-friendly furniture (eco-and organic labeled)	10.7247	53	47	4	25	179	308		0.189964	0.168459	0.641577	1		0.012987	0.0811688		7.14978
	C5.1 Reduce your local leisure (cinema, theater, concerts) by 30%	21.4493	20	45	2	24	217	308		0.070922	0.159574	0.769504	1		0.00649351	0.0779221		15.0084
	C5.2 Choose 30% more eco-labeled holidays	51.1612	66	60	23	10	149	308		0.24	0.218182	0.541818	1		0.0746753	0.0324675		32.8227
	C5.3 Reduce your holidays activities by 30%	107.835	13	54	4	79	158	308		0.0577778	0.24	0.702222	1		0.012987	0.256494		69.3225
