# Supplementary material
Source: MDPI journal article supplement (https://www.mdpi.com/2071-1050/10/11/4044)
Supplement: s1 [file s1 › Tables.xlsx]

## Sheet: Table S1
Simulation result overview including all countries
Per consumption unit										Reduction in percent of reduction***
variable*	CF**	% of total	climate game	reduction of baseline CF	reduction of sim1	% of baseline CF	% of sim1			Variable	Median CF reduction	(%) red.
Housing	1769.84	0.207011	Baseline CF							Housing	875.184	0.208043
Housing	1264.35	0.199954	Simulation 1	0.285612		0.714388				Food	1432.57	0.340541
Housing	894.658	0.20601	Simulation 2	0.494498	0.292399	0.505502	0.707601			Other	181.807	0.0432182
Food	2563.56	0.299849	Baseline CF							Mobility	1717.18	0.408198
Food	1703.79	0.269449	Simulation 1	0.335383		0.664617				Total	4206.74
Food	1131	0.260432	Simulation 2	0.558818	0.336186	0.441182	0.663814
Other	1290.53	0.150948	Baseline CF
Other	1192.97	0.188665	Simulation 1	0.0755975		0.924403
Other	1108.72	0.255302	Simulation 2	0.140878	0.0706193	0.859122	0.929381
Mobility	2925.59	0.342193	Baseline CF
Mobility	2162.11	0.341932	Simulation 1	0.260964		0.739036
Mobility	1208.41	0.278256	Simulation 2	0.586952	0.4411	0.413048	0.5589
Total	9506.69		Baseline CF
Total	7112.48		Simulation 1	0.251845		0.748155
Total	4914.88		Simulation 2	0.483008	0.308978	0.516992	0.691022
Per household
variable*	CF**	% of total	climate game	reduction of baseline CF	reduction of sim1	% of baseline CF	% of sim1
Housing	2754.71	0.201519	Baseline CF
Housing	2017.7	0.200388	Simulation 1	0.267545		0.732455
Housing	1383.74	0.197927	Simulation 2	0.497681	0.314198	0.502319	0.685802
Food	4020.27	0.2941	Baseline CF
Food	2567.59	0.255	Simulation 1	0.361339		0.638661
Food	1806.93	0.258457	Simulation 2	0.550546	0.296256	0.449454	0.703744
Other	2035.55	0.148909	Baseline CF
Other	1922.06	0.19089	Simulation 1	0.0557528		0.944247
Other	1770.95	0.253312	Simulation 2	0.12999	0.0786202	0.87001	0.92138
Mobility	4859.19	0.355471	Baseline CF
Mobility	3561.61	0.353721	Simulation 1	0.267037		0.732963
Mobility	2029.57	0.290304	Simulation 2	0.582323	0.430152	0.417677	0.569848
Total	14963.9		Baseline CF
Total	11313.9		Simulation 1	0.243922		0.756078
Total	7866.5		Simulation 2	0.474301	0.304703	0.525699	0.695297
* Variables are the four household sectors
** CF values are carbon footprints before and after the two rounds of simulations, measured in median CO2 equivalents per year
*** This table show the differences between median baseline CF, and median CF after simulation 2, for each household sector and total. The values are in CO2 equivalents per cu per year in the left panel, and percent in the right hand panel.

## Sheet: Table S2
Simulation result Housing sector including all countries
variable*	CF**	% of total	climate game	% of baseline CF	% of sim1
Heating	491.852	0.441684	Baseline CF
Heating	274.229	0.340016	Simulation 1	0.557545
Heating	119.902	0.201707	Simulation 2	0.243776	0.437231
Hot Water	124.667	0.111951	Baseline CF
Hot Water	90.6667	0.112417	Simulation 1	0.727273
Hot Water	56.1	0.0943752	Simulation 2	0.45	0.61875
Cooking	136.733	0.122787	Baseline CF
Cooking	135.014	0.167403	Simulation 1	0.987423
Cooking	127.759	0.214924	Simulation 2	0.934363	0.946264
Lights etc	240.171	0.215675	Baseline CF
Lights etc	190.705	0.236454	Simulation 1	0.794037
Lights etc	177.63	0.29882	Simulation 2	0.739595	0.931436
Furniture/renovation	31.5762	0.0283555	Baseline CF
Furniture/renovation	27.3226	0.0338772	Simulation 1	0.865292
Furniture/renovation	24.4635	0.0411541	Simulation 2	0.774745	0.895357
Appliances	81.8667	0.0735165	Baseline CF
Appliances	81.8667	0.101506	Simulation 1	1
Appliances	81.8667	0.137722	Simulation 2	1	1
House construction	6.71606	0.00603104	Baseline CF
House construction	6.71606	0.00832721	Simulation 1	1
House construction	6.71606	0.0112982	Simulation 2	1	1
* Variables are the commodities within the household sector Housing
** CF values are carbon footprints before and after the two rounds of simulations, measured in median CO2 equivalents per consumption units per year

## Sheet: Table S3
Simulation result Food sector including all countries
variable*	CF**	% of total	climate game	% of baseline	% of sim1
Red meat	252.172	0.113222	Baseline CF
Red meat	171.612	0.111547	Simulation 1	0.680537
Red meat	96.8413	0.0914857	Simulation 2	0.384029	0.564303
Other meat	96.1803	0.0431837	Baseline CF
Other meat	64.5185	0.0419365	Simulation 1	0.670807
Other meat	44.5654	0.0421008	Simulation 2	0.463353	0.690739
Fish	32.7687	0.0147127	Baseline CF
Fish	22.1189	0.0143771	Simulation 1	0.675
Fish	14.2721	0.0134828	Simulation 2	0.435542	0.645247
Dairy	319.072	0.143259	Baseline CF
Dairy	187.091	0.121608	Simulation 1	0.586359
Dairy	125.825	0.118866	Simulation 2	0.394345	0.672532
Fruit/vegetables	96.5937	0.0433693	Baseline CF
Fruit/vegetables	72.2825	0.046983	Simulation 1	0.748315
Fruit/vegetables	54.7231	0.0516967	Simulation 2	0.566528	0.757072
Drinks (canned/bottled)	66.04	0.0296511	Baseline CF
Drinks (canned/bottled)	30.6249	0.019906	Simulation 1	0.463733
Drinks (canned/bottled)	14.923	0.0140977	Simulation 2	0.225969	0.487283
Ready made meals	14.9682	0.00672053	Baseline CF
Ready made meals	6.73569	0.00437814	Simulation 1	0.45
Ready made meals	4.8497	0.00458149	Simulation 2	0.324	0.72
Restaurant & school meals	533.867	0.239699	Baseline CF
Restaurant & school meals	322.883	0.209871	Simulation 1	0.6048
Restaurant & school meals	232.771	0.219898	Simulation 2	0.43601	0.720917
Other food	815.573	0.366182	Baseline CF
Other food	660.614	0.429394	Simulation 1	0.81
Other food	469.77	0.44379	Simulation 2	0.576	0.711111
* Variables are the commodities within the household sector Food
** CF values are carbon footprints before and after the two rounds of simulations, measured in median CO2 equivalents per consumption units per year

## Sheet: Table S4
Simulation result Other consumption including all countries
variable*	CF**	% of total	climate game	% of baseline	% of sim1
Clothes shoes	126.87	0.132025	Baseline CF
Clothes shoes	100.285	0.113499	Simulation 1	0.790455
Clothes shoes	83.65	0.103185	Simulation 2	0.659339	0.834125
Cosmetics hygiene	144	0.149852	Baseline CF
Cosmetics hygiene	118.8	0.134454	Simulation 1	0.825
Cosmetics hygiene	96	0.118419	Simulation 2	0.666667	0.808081
Digital devices	312.2	0.324887	Baseline CF
Digital devices	294.967	0.333833	Simulation 1	0.9448
Digital devices	271.2	0.334534	Simulation 2	0.868674	0.919426
Holiday & leisure activities	122.854	0.127847	Baseline CF
Holiday & leisure activities	114.499	0.129586	Simulation 1	0.931988
Holiday & leisure activities	104.003	0.128291	Simulation 2	0.846558	0.908335
Newspapers magazines books	20	0.0208128	Baseline CF
Newspapers magazines books	20	0.0226353	Simulation 1	1
Newspapers magazines books	20.8	0.0256575	Simulation 2	1.04	1.04
Insurance (administration etc.)	221.692	0.230701	Baseline CF
Insurance (administration etc.)	221.692	0.250904	Simulation 1	1
Insurance (administration etc.)	221.692	0.273465	Simulation 2	1	1
Phone internet	13.3333	0.0138752	Baseline CF
Phone internet	13.3333	0.0150902	Simulation 1	1
Phone internet	13.3333	0.0164471	Simulation 2	1	1
* Variables are the commodities within the household sector Other consumption
** CF values are carbon footprints before and after the two rounds of simulations, measured in median CO2 equivalents per consumption units per year

## Sheet: Table S5
Simulation result Mobility sector including all countries
variable*	CF**	% of total	climate game	% of baseline	% of sim1
Car, MC and other motorized vehicles	1373.38	0.584042	Baseline CF
Car, MC and other motorized vehicles	822.208	0.50914	Simulation 1	0.598675
Car, MC and other motorized vehicles	416.189	0.468805	Simulation 2	0.30304	0.506184
Train	3.33917	0.00142001	Baseline CF
Train	3.01261	0.00186551	Simulation 1	0.902204
Train	3.02522	0.00340768	Simulation 2	0.90598	1.00419
Bus	34.98	0.0148756	Baseline CF
Bus	27.0941	0.0167776	Simulation 1	0.77456
Bus	27.8217	0.031339	Simulation 2	0.795361	1.02686
Plane	939.808	0.399662	Baseline CF
Plane	762.581	0.472217	Simulation 1	0.811422
Plane	440.73	0.496449	Simulation 2	0.468958	0.577946
* Variables are the commodities within the household sector Mobility
** CF values are carbon footprints before and after the two rounds of simulations, measured in median CO2 equivalents per consumption units per year

## Sheet: Table S6
Flights
Actions chosen regarding flights (%)
Action card	Simulation	Germany	France	Sweden	Norway
-90% flights intercontinental	Sim1 %	0.05	0.04	0.07	0.14
	Sim2 %	0.25	0.52	0.6	0.57
-50% flights intercontinental	Sim1 %	0.07	0.15	0.21	0.19
	Sim2 %	0.38	0.52	0.42	0.43
Private flights in distance (km) per year per capita
Country	Domestic		Intereuropean		Intercontinental		Total
France	250	0.0374251	800	0.11976	5630	0.842814	6680
Germany	70	0.00970874	2200	0.305132	4940	0.68516	7210
Norway	860	0.0677699	7110	0.560284	4730	0.372734	12690
Sweden	1520	0.193384	3010	0.382952	3320	0.422392	7860

## Sheet: Table S7
Car
Car usage in distance (km) per year per cu
Country	Commuting		Other local travel		Holidays		Total
France	6000	0.46	3000	0.23	3000	0.23	13000
Germany	5000	0.5	3000	0.3	2000	0.2	10000
Norway	2000	0.33	3000	0.5	2000	0.33	6000
Sweden	1000	0.2	2000	0.4	2000	0.4	5000
Car usage in distance (km) per day per cu
Country	Commuting		Other local travel		Holidays		Total
France	16.4384	0.46	8.21918	0.23	8.21918	0.23	35.6164
Germany	13.6986	0.5	8.21918	0.3	5.47945	0.2	27.3973
Norway	5.47945	0.33	8.21918	0.5	5.47945	0.33	16.4384
Sweden	2.73973	0.2	5.47945	0.4	5.47945	0.4	13.6986
Country	Average number of cars per household			% of households with no car
France	1.6			0.07
Germany	1.2			0.17
Norway	1			0.26
Sweden	1.1			0.15

## Sheet: Table S8
Simulation result overview by country
Variable*	CF**	Climate game		Reduction %
Germany	10206.7	Baseline footprint		1
Germany	7588.18	Simulation 1		0.743448
Germany	5376.54	Simulation 2		0.526764
Norway	11338.5	Baseline footprint		1
Norway	9183.65	Simulation 1		0.809953
Norway	5862.61	Simulation 2		0.517054
France	10039	Baseline footprint		1
France	7132.31	Simulation 1		0.71046
France	5159.55	Simulation 2		0.51395
Sweden	7299.13	Baseline footprint		1
Sweden	5526.06	Simulation 1		0.757085
Sweden	4188.92	Simulation 2		0.573893
* Variables are the cities investigated (Mannheim, Bergen, Aix en Provence, Umea) reffered to by country name
** CF values are carbon footprints before and after the two rounds of simulations, measured in median CO2 equivalents per consumption units per year

## Sheet: Table S9
Regression - Reduction potential vs. Chosen action cards
Simulation	Sector	beta	SE	P
Model by simulation
Voluntary scenario	-	-0.0289539	0.0119339	0.018
Forced scenario	-	0.0184589	0.0175452	0.297
Model by simulation and sector
Voluntary scenario	Food	-0.023925	0.0224753	0.306476
Voluntary scenario	Housing	-0.0543695	0.0173848	0.00581931
Voluntary scenario	Mobility	-0.0710309	0.0210806	0.00625795
Voluntary scenario	Other	0.0125143	0.0189367	0.520249
Forced scenario	Food	0.0403095	0.0231905	0.105789
Forced scenario	Housing	-0.0564801	0.0433313	0.208848
Forced scenario	Mobility	0.0298784	0.0295794	0.334147
Forced scenario	Other	0.0871979	0.0367314	0.0336875
1. Linear regression models were used to assess associations between the households' reduction potential (independent variable) and their chosen action cards (dependent variable). Reduction potential was log-transformed (kg CO2e per cu per year) and chosen actions (frequency of households that selected the action card) were modelled separately for the Voluntary scenario (sim1) and the Forced scen…
2. Model by simulation was stratified using all household sectors. Model by simulation and sector was stratified within each household sector.

## Sheet: Table S10
Quintiles: Mobility and Food
				Q1	Q2	Q3	Q4	Q5
Mobility	Baseline CF Mobility			1159.58	2395.45	2949.25	4840.23	7397.34
	Baseline CF Plane			0	561.04	1124.44	1840.74	3940.56
	Reduction potential Plane (M4.1-M4.4)			0	381.507	778.296	1294.56	3189.4
	Observed reduction from actions M4.1-M4.4		sim 1	0	0	0	0	0
			sim2	380.492	403.803	703.769	1470.38	2474.61
	Baseline CF car			220.278	660	1395.51	1857.7	2401
	Reduction potential car (M2.3, M3.1- M3.3)			117	299.895	992.615	1375.82	1770.38
	Observed reduction from actions M2.3, M3.1- M3.3		sim 1	73.7255	113.813	241.534	103.6	421.285
			sim2	156.28	360.559	455.515	586.343	859.7
Food	Baseline CF Food			2069.92	2369.45	2835.39	2926.85	2888.14
	Baseline CF Fish & Meat			393.439	528.381	602.341	774.218	674.673
	Reduction potential Fish & Meat (F2.1-F2.3)			328.028	458.561	573.231	561.101	591.79
	Observed reduction from actions F2.1-F2.3		sim 1	23.5384	75.8297	116.862	0	0
			sim2	110.727	113.813	289.87	471.016	648.416
Quintiles: mobility and food. Households’ median GHG reduction potential, observed reductions, and baseline carbon footprint (kg CO2e per CU per year) in mobility and food by quintiles (Q1-Q5).
Qunitiles are percitiles split into five groups with 20% in each where Q1 is the lowest 20% and Q5 the highest 20%.
1.	Plane and car are commodities found in the household consumption sector “mobility”.
2.	Fish and meat is a sum of all fish and meat commodities found in the “food” sector.
3.	The reduction potentials show how much households could reduce when corresponding action card(s) was chosen.
4.	The observed reductions are median values of the combined action cards that were actually chosen.
5.	For more information about the action cards (e.g., M2.3, F2.1. etc.) see illustration in Figure 3 and descriptive table in S2

[truncated: 1 more sheets: Table S11]
