# Supplementary material
Source: MDPI journal article supplement (https://www.mdpi.com/2071-1050/10/11/4044)

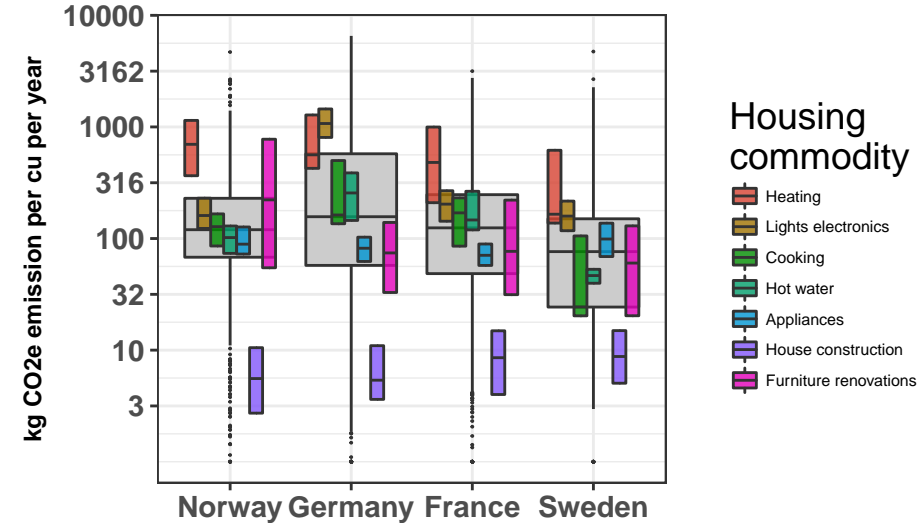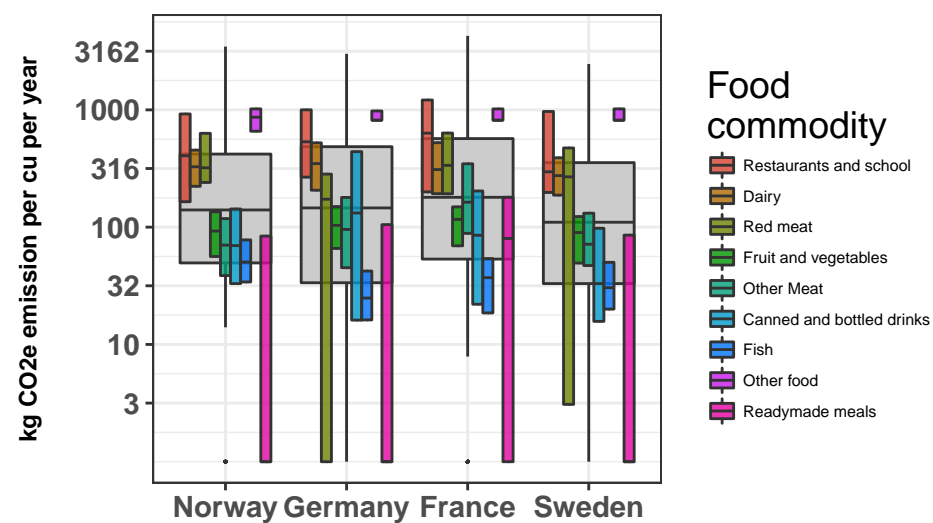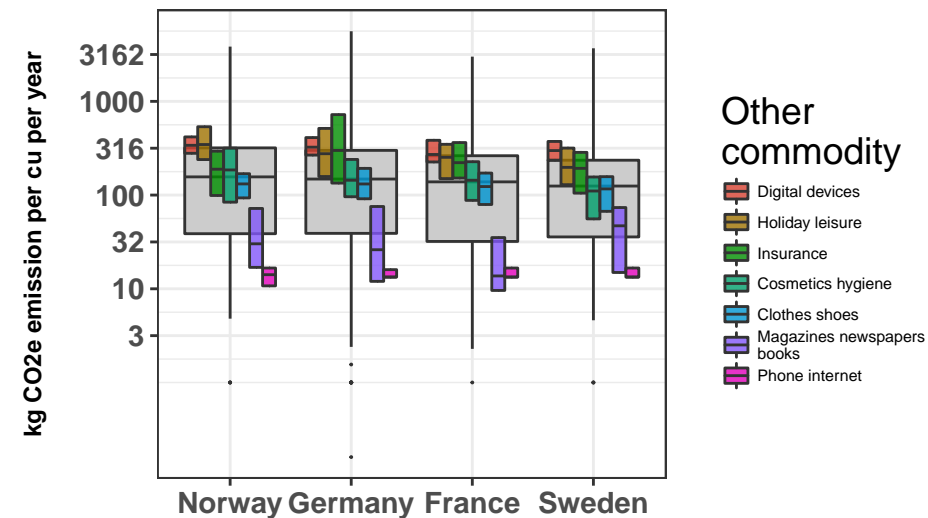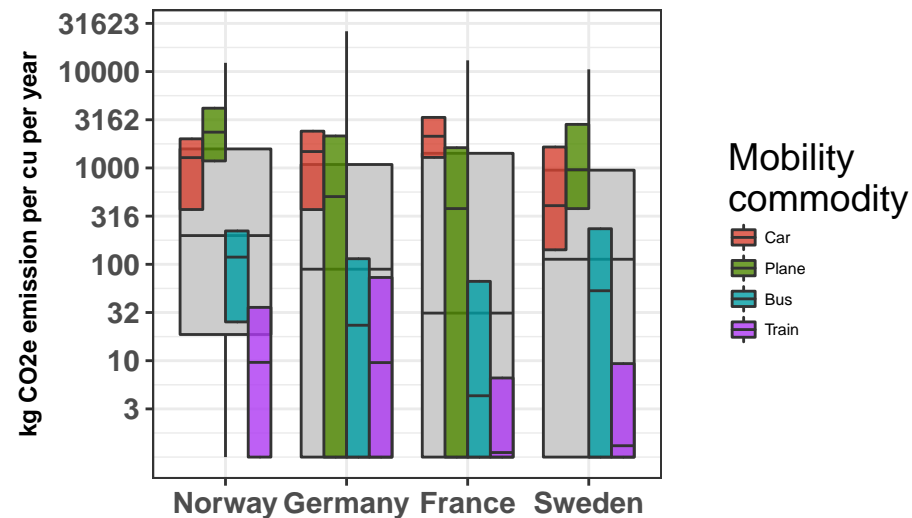

Supplement: s1 [file s1 › Sector_spec.pdf]
